# Supplementary material
Source: HighWire-hosted journal article supplement (http://www.qdcxjkg.com/highwire/filestream/113641/field_highwire_adjunct_files/0/ERJ-01376-2012_Disclosures.pdf)
Supplement: ERJ-01376-2012_Disclosures.pdf [file ERJ-01376-2012_Disclosures.pdf]

**H.A.W.M. Tiddens** acted in the last 4 years as consultant for the BV kindergeneeskunde of the Sophia Children's Hospital on advisory boards for Bayer Healthcare AG, Gilead Sciences, Inspire Pharmaceuticals, Johnson and Johnson, MAP Pharmaceuticals, Novartis Pharmaceuticals, Pharmaxis Pharmaceuticals, Insmmed, Vertex, and Siemens. In addition the BV Kindergeneeskunde received speaker fees for presentations by HAWMT from Chiesi, Gilead, and Roche. He does not own any stock. The BV Kindergeneeskunde received unconditional research grants from Roche and Gilead for research supervised by H.A.W.M. Tiddens.
